# Supplementary material
Source: PubMed Central journal article supplement (PMC10192075)
Supplement: NIHMS1879351-supplement-2.pdf [file NIHMS1879351-supplement-2.pdf]

**Supplementary Table S1. ADT + PI3Ki + PD-1 antibody leads to TAM activation within TME of PTEN/p53-deficient prostate tumors.** Single cell suspension of PTEN/p53-deficient prostate tumors were treated with copanlisib (C, 100 nM), PD-1 antibody (P, 10 µg/mL) or their combination under normal and AD condition for 24 hours. *Ex vivo* conditioned media were collected from these groups and analyzed using cytokine array kits.

| Cytokine array on ex vivo conditioned media          |                 |                                                        |            |            |             |             |             |                    |
|------------------------------------------------------|-----------------|--------------------------------------------------------|------------|------------|-------------|-------------|-------------|--------------------|
| Sr. No.                                              | Cytokines       | %changes in cytokine secretion (relative to untreated) |            |            |             |             |             |                    |
|                                                      |                 | P                                                      | AD         | AD+P       | C           | C+P         | AD+C        | AD+C+P             |
| <b>Increased following AD+C+P treatment</b>          |                 |                                                        |            |            |             |             |             |                    |
| 1                                                    | <b>IL1α</b>     | -26.333300                                             | 61.021150  | 85.69451   | -100.000000 | -100.000000 | 88.369850   | <b>61.069800</b>   |
| 2                                                    | <b>TNFα</b>     | -100.000000                                            | 8.506699   | 144.939300 | -100.000000 | -100.000000 | 41.572050   | <b>51.814760</b>   |
| 3                                                    | <b>GM-CSF</b>   | 19.278860                                              | 88.257380  | 107.41090  | -100.000000 | -100.000000 | 12.352890   | <b>48.580550</b>   |
| 4                                                    | <b>CCL22</b>    | 9.006961                                               | 31.98788   | 65.60859   | -100.000000 | -100.000000 | 49.451760   | <b>44.71808</b>    |
| 5                                                    | <b>CCL5</b>     | 0.000000                                               | 22.325350  | 27.397450  | 0.000000    | 0.000000    | 24.253130   | <b>27.535750</b>   |
| 6                                                    | <b>IL-6</b>     | 0.000000                                               | 25.763060  | 32.040120  | 0.000000    | 0.000000    | 24.487010   | <b>25.972800</b>   |
| 7                                                    | <b>CXCL16</b>   | 11.484380                                              | 7.987243   | 26.19388   | 15.674120   | -8.284720   | 14.984800   | <b>19.13644</b>    |
| <b>Decreased following AD+C+P treatment</b>          |                 |                                                        |            |            |             |             |             |                    |
| 8                                                    | <b>SerpinF1</b> | -39.133400                                             | -34.827000 | -24.397000 | -100.000000 | -70.369900  | -100.000000 | <b>-100.000000</b> |
| 9                                                    | <b>CCL6</b>     | 14.95199                                               | -40.8020   | -32.5690   | -37.9043    | -52.0272    | -54.0922    | <b>-51.2523</b>    |
| 10                                                   | <b>IGFBP-2</b>  | 24.223760                                              | 62.621260  | 37.45212   | -100.000000 | -100.000000 | -100.000000 | <b>-51.095000</b>  |
| 11                                                   | <b>ICAM1</b>    | -5.549780                                              | 24.392290  | -8.29913   | -100.000000 | -17.097000  | -35.209400  | <b>-41.958200</b>  |
| 12                                                   | <b>LDLR</b>     | 6.606445                                               | 23.173080  | 13.60238   | -100.000000 | -52.781700  | -65.185800  | <b>-40.319100</b>  |
| 13                                                   | <b>RBP4</b>     | 9.331950                                               | -26.164400 | 14.170590  | -22.208400  | -6.533690   | -7.474560   | <b>-34.426600</b>  |
| 14                                                   | <b>IGFBP-3</b>  | 7.288951                                               | -2.700480  | -6.85009   | -27.023100  | -26.258700  | -27.663900  | <b>-28.235500</b>  |
| 15                                                   | <b>PTX-3</b>    | 10.519660                                              | -28.154300 | -19.312400 | -5.962720   | -15.578100  | -33.083100  | <b>-24.402200</b>  |
| 16                                                   | <b>M-CSF</b>    | 1.004784                                               | 5.565133   | 14.034590  | -100.000000 | -26.022500  | -27.562600  | <b>-23.147500</b>  |
| Red color = ADT/copanlisib/aPD-1 regulated cytokines |                 |                                                        |            |            |             |             |             |                    |
